# Supplementary material for: A role for condensin in mediating transcriptional adaptation to environmental stimuli
Source: Life Sci Alliance. 2021 Jun 3;4(7):e202000961. doi: 10.26508/lsa.202000961 (PMC8200293; doi:10.26508/lsa.202000961)
Supplement: Supplementary file 1 [file LSA-2020-00961_TableS1.xlsx]

## Sheet: Table of Content
Table S1. Lists of differentially expressed genes.
	Name	Description
Sheet 2	Overlap Fig 5B Upregulated	Genes upregulted between the ycg1Degron2 strain before and after depletion, as well as between the control and ycg1Degron2 strain after depletion.
Sheet 3	Overlap Fig 5B Downregulated	Genes downregulted between the ycg1Degron2 strain before and after depletion, as well as between the control and ycg1Degron2 strain after depletion.
Sheet 4	Overlap Fig S5B Upregulated	Genes upregulated between the control and ycg1Degron1 strain (in M), as well as between the control and ycg1Degron2 strain after depletion.
Sheet 5	Overlap Fig S5B Downregulated	Genes downregulated between the control and ycg1Degron1 strain (in M), as well as between the control and ycg1Degron2 strain after depletion.

## Sheet: Overlap Fig 5B Upregulated
			Log2 fold change
Systematic name	Standard name	Gene name	ycg1Degron2 vs control in Met + Auxin	Met + Auxin vs Untreated in ycg1Degron2
YOL093W	TRM10	Transfer RNA Methyltransferase	0.561687	0.56173
YBR021W	FUR4	5-FlUoRouridine sensitivity	0.869145	0.627817
YBR267W	REI1	REquired for Isotropic bud growth	0.755621	0.617929
YDR418W	RPL12B	Ribosomal Protein of the Large subunit	0.425158	0.66448
YGR162W	TIF4631	Translation Initiation Factor	0.420352	0.356589
YPL249C-A	RPL36B	Ribosomal Protein of the Large subunit	0.607862	0.754798
YDL166C	FAP7	Factor Activating Pos9	0.388808	0.60815
YJL200C	ACO2	ACOnitase	0.492496	0.71116
YHR152W	SPO12	SPOrulation	0.274146	0.258532
YGR085C	RPL11B	Ribosomal Protein of the Large subunit	0.666029	0.776086
YMR131C	RRB1	Regulator of Ribosome Biogenesis	0.432193	0.298756
YMR310C			0.671469	0.40313
YGR173W	RBG2	RiBosome interacting Gtpase	0.718974	0.370074
YEL009C	GCN4	General Control Nonderepressible	0.39598	0.296024
YPR080W	TEF1	Translation Elongation Factor	0.693697	0.546191
YGR240C	PFK1	PhosphoFructoKinase	0.179717	0.262608
YHL033C	RPL8A	Ribosomal Protein of the Large subunit	0.694621	1.30519
YPR187W	RPO26	RNA POlymerase	0.463243	0.38555
YOL141W	PPM2	Protein Phosphatase Methyltransferase	0.568172	0.671412
YGR195W	SKI6	SuperKIller	0.355194	0.189172
YHR216W	IMD2	IMP Dehydrogenase	0.507185	0.587077
YKL056C	TMA19	Translation Machinery Associated	0.516277	0.426934
YPL037C	EGD1	Enhancer of Gal4 DNA binding	0.29982	0.316474
YNL232W	CSL4	Cep1 Synthetic Lethal	0.43564	0.338522
YOL039W	RPP2A	Ribosomal Protein P2 Alpha	0.680099	0.866193
YNL209W	SSB2	Stress-Seventy subfamily B	0.479369	0.329833
YDL157C			0.446262	0.742256
YPR016C	TIF6	Translation Initiation Factor	0.361751	0.218489
YLR060W	FRS1	phenylalanyl (F)-tRNA Synthetase	0.247992	0.198523
YNL178W	RPS3	Ribosomal Protein of the Small subunit	0.706586	0.921972
YGL200C	EMP24	EndoMembrane Protein	0.303149	0.2651
YPL090C	RPS6A	Ribosomal Protein of the Small subunit	0.539795	2.21094
YFR018C			0.373968	0.589957
YDL213C	NOP6	NucleOlar Protein	0.470343	0.718986
YNL292W	PUS4	PseudoUridine Synthase	0.498245	0.370405
YER002W	NOP16	NucleOlar Protein	0.470299	0.373539
YIL121W	QDR2	QuiniDine Resistance	0.581495	2.32688
YBR093C	PHO5	PHOsphate metabolism	1.5243	3.29458
YLR340W	RPP0	Ribosomal Protein P0	0.522273	0.721252
YEL032W	MCM3	MiniChromosome Maintenance	0.229394	0.258634
YML060W	OGG1	8-OxoGuanine Glycosylase/lyase	0.696455	0.917218
YNL186W	UBP10	UBiquitin-specific Protease	0.427975	0.272607
YPR110C	RPC40	RNA Polymerase C	0.461573	0.256627
YGL097W	SRM1	Suppressor of Receptor Mutations	0.264113	0.345333
YCR034W	ELO2	fatty acid ELOngation	0.314636	0.295795
YNR016C	ACC1	Acetyl-CoA Carboxylase	0.399374	0.237086
YGL105W	ARC1	Aminoacyl-tRNA synthetase Cofactor	0.207077	0.186872
YMR049C	ERB1	Eukaryotic Ribosome Biogenesis	0.703549	0.509541
YPR190C	RPC82	RNA Polymerase C	0.364158	0.394685
YNR017W	TIM23	Translocase of the Inner Mitochondrial membrane	0.286586	0.32451
YNL023C	FAP1	FKBP12-Associated Protein	0.323531	0.291761
YOR246C	ENV9	late ENdosome and Vacuole interface function	0.385711	0.43874
YNL052W	COX5A	Cytochrome c OXidase	0.29193	0.59697
YLL034C	RIX7	RIbosome eXport	0.59651	0.466005
YHR013C	ARD1	ARrest Defective	0.328779	0.321866
YHR019C	DED81	Defines Essential Domain	0.492111	0.251298
YLR075W	RPL10	Ribosomal Protein of the Large subunit	0.386134	0.605742
YLR435W	TSR2	Twenty S rRNA accumulation	0.561718	0.42711
YFR031C-A	RPL2A	Ribosomal Protein of the Large subunit	0.615713	0.831691
YDR012W	RPL4B	Ribosomal Protein of the Large subunit	0.45565	0.395342
YML080W	DUS1	DihydroUridine Synthase	0.512777	0.351074
YGL147C	RPL9A	Ribosomal Protein of the Large subunit	0.873436	1.11426
YGR031W	IMO32	Intermediate cleaved by Mitochondrial Octapeptidyl aminopeptidase	0.281762	0.523093
YPR088C	SRP54	Signal Recognition Particle 54-kD subunit	0.273007	0.245842
YGR200C	ELP2	ELongator Protein	0.560446	0.343843
YER107C	GLE2	GLFG LEthal	0.215871	0.226814
YKL024C	URA6	URAcil requiring	0.413249	0.298625
YKL181W	PRS1	PhosphoRibosylpyrophosphate Synthetase	0.463758	0.353913
YML063W	RPS1B	Ribosomal Protein of the Small subunit	0.49286	0.69272
YMR242C	RPL20A	Ribosomal Protein of the Large subunit	0.533077	0.613157
YBL024W	NCL1	NuCLear protein	0.415186	0.209558
YLR406C	RPL31B	Ribosomal Protein of the Large subunit	0.517822	0.768938
YOR340C	RPA43	RNA Polymerase A	0.775289	0.590855
YDR299W	BFR2	BreFeldin A Resistance	0.730524	0.544726
YLR068W	FYV7	Function required for Yeast Viability	0.720317	0.555311
YPR033C	HTS1	Histidine-Trna Synthetase	0.324913	0.215962
YPL049C	DIG1	Down-regulator of Invasive Growth	0.285086	0.473897
YJL117W	PHO86	PHOsphate metabolism	0.243616	0.326611
YHR068W	DYS1	DeoxyhYpusine Synthase	0.334926	0.242091
YDR312W	SSF2	Suppressor of ste4 (Four)	0.354252	0.351441
YOR342C			0.9503	0.689482
YGR034W	RPL26B	Ribosomal Protein of the Large subunit	0.572303	0.788227
YCR063W	BUD31	BUD site selection	0.701332	0.723338
YIL018W	RPL2B	Ribosomal Protein of the Large subunit	0.577218	0.726649
YAL020C	ATS1	Alpha Tubulin Suppressor	0.45048	0.397115
YGR083C	GCD2	General Control Derepressed	0.31114	0.244977
YOL022C	TSR4	Twenty S rRNA accumulation	0.524375	0.592666
YLL011W	SOF1	Suppressor Of Fibrillarin	0.661137	0.401623
YML026C	RPS18B	Ribosomal Protein of the Small subunit	0.445076	0.600718
YGR279C	SCW4	Soluble Cell Wall protein	0.233651	0.392407
YGL123W	RPS2	Ribosomal Protein of the Small subunit	0.557186	0.730171
YPR062W	FCY1	FluoroCYtosine resistance	0.379157	0.430687
YIL064W	EFM4	Elongation Factor Methyltransferase	0.741229	0.830488
YMR146C	TIF34	Translation Initiation Factor	0.405787	0.327864
YCR087C-A			0.708266	0.695034
YLR029C	RPL15A	Ribosomal Protein of the Large subunit	0.7453	0.940913
YLR333C	RPS25B	Ribosomal Protein of the Small subunit	0.57194	0.593771
YHR032W	ERC1	Ethionine Resistance Conferring	0.485562	0.584015
YDR429C	TIF35	Translation Initiation Factor	0.33084	0.30089
YOR004W	UTP23	U Three-associated Protein	0.724547	0.532031
YML102W	CAC2	Chromatin Assembly Complex	0.316099	0.570842
YLR272C	YCS4	Yeast Condensin Subunit	0.238029	0.300808
YPL220W	RPL1A	Ribosomal Protein of the Large subunit	0.41499	0.445497
YBR265W	TSC10	Temperature-sensitive Suppressors of Csg2 mutants	0.400812	0.241986
Q0055	AI2		0.477609	0.636185
YJR070C	LIA1	Ligand of eIF5A	0.752965	0.77784
YPL231W	FAS2	Fatty Acid Synthetase	0.422953	0.445598
YMR290C	HAS1	Helicase Associated with Set1	0.563359	0.495946
YLL045C	RPL8B	Ribosomal Protein of the Large subunit	0.661589	0.803145
YPL211W	NIP7	Nuclear ImPort	0.650247	0.483503
YAL038W	CDC19	Cell Division Cycle	0.398306	0.477095
YKL099C	UTP11	U Three Protein	0.69755	0.43948
YDR087C	RRP1	Ribosomal RNA Processing	0.707798	0.469239
YHL025W	SNF6	Sucrose NonFermenting	0.24076	0.337791
YDL060W	TSR1	Twenty S rRNA accumulation	0.693734	0.398271
YIL069C	RPS24B	Ribosomal Protein of the Small subunit	0.55631	0.717958
YHR193C	EGD2	Enhancer of Gal4 DNA binding	0.414029	0.322447
YJR105W	ADO1	ADenOsine kinase	0.375406	0.600944
YLR413W	INA1	INdicator of Abscission	1.4123	0.62186
YBR092C	PHO3	PHOsphate metabolism	0.972163	0.970138
YKR072C	SIS2	SIt4 Suppressor	0.251625	0.265452
YHR128W	FUR1	5-FluoroURidine resistant	0.696519	0.851598
YDR225W	HTA1	Histone h Two A	0.288899	0.409973
YPR143W	RRP15	Ribosomal RNA Processing	0.534759	0.428966
YJL122W	ALB1	Arx1 Little Brother	0.839292	0.593167
YGL135W	RPL1B	Ribosomal Protein of the Large subunit	0.650213	0.765261
YLR002C	NOC3	NucleOlar Complex associated	0.744063	0.422468
Q0065	AI4		0.454552	0.609863
YJL069C	UTP18	U Three Protein	0.527655	0.291664
YJR016C	ILV3	IsoLeucine-plus-Valine requiring	0.786917	0.513202
YGL009C	LEU1	LEUcine biosynthesis	0.663064	0.91081
YLR243W	GPN3	Gly-Pro-Asn (N) motif	0.433035	0.30355
YEL054C	RPL12A	Ribosomal Protein of the Large subunit	0.658364	0.771528
YNL072W	RNH201	RNase H	0.461968	0.590376
YAL025C	MAK16	MAintenance of Killer	0.908166	0.715662
YNL163C	RIA1	RIbosome Assembly	0.317995	0.364469
YGL076C	RPL7A	Ribosomal Protein of the Large subunit	0.533809	0.655022
YNL068C	FKH2	ForK head Homolog	0.327047	0.258263
YNL061W	NOP2	NucleOlar Protein	0.719884	0.429147
YLR249W	YEF3	Yeast Elongation Factor	0.485866	0.43248
YER095W	RAD51	RADiation sensitive	0.270076	0.632604
YBR263W	SHM1	Serine HydroxyMethyltransferase	0.317929	0.229848
YAL058W	CNE1	CalNExin and calreticulin homolog	0.315467	0.354462
YNL313C	EMW1	Essential for Maintenance of the cell Wall	0.364435	0.283362
YCR051W			0.769458	0.606839
YKL009W	MRT4	mRNA Turnover 4	0.62785	0.299654
YOR091W	TMA46	Translation Machinery Associated	0.713823	0.319491
YOR063W	RPL3	Ribosomal Protein of the Large subunit	0.711435	0.680864
YGL029W	CGR1	Coiled-coil Growth-Regulated	0.999187	0.766993
YJR060W	CBF1	Centromere Binding Factor	0.323825	0.582806
YHR072W-A	NOP10	NucleOlar Protein	0.428384	0.32633
YGR234W	YHB1	Yeast flavoHemogloBin	0.428959	0.870459
YCR057C	PWP2	Periodic tryptophan (W) Protein	0.668626	0.365813
YML022W	APT1	Adenine PhosphoribosylTransferase	0.612907	0.457449
YOR369C	RPS12	Ribosomal Protein of the Small subunit	0.699742	0.964521
Q0050	AI1		0.40051	0.583143
YPR137W	RRP9	Ribosomal RNA Processing	0.512079	0.417593
YJR145C	RPS4A	Ribosomal Protein of the Small subunit	0.551299	0.762956
YJR014W	TMA22	Translation Machinery Associated	0.49274	0.642052
YOR006C	TSR3	Twenty S rRNA accumulation	0.47878	0.507805
YFR032C-A	RPL29	Ribosomal Protein of the Large subunit	0.578721	0.850106
YOL010W	RCL1	Rna 3'-terminal phosphate Cyclase Like	0.635721	0.479376
YJR123W	RPS5	Ribosomal Protein of the Small subunit	0.483973	0.688863
YHR065C	RRP3	Ribosomal RNA Processing	0.473045	0.374461
YGL078C	DBP3	Dead Box Protein	0.703893	0.583006
YLR186W	EMG1	Essential for Mitotic Growth	0.458289	0.388223
YJR094W-A	RPL43B	Ribosomal Protein of the Large subunit	0.559967	0.904715
YKL172W	EBP2	EBNA1-binding protein (homolog)	0.696238	0.35158
YNR015W	SMM1	Suppressor of Mitochondrial Mutation	0.508673	0.387542
YJR002W	MPP10	M Phase Phosphoproteins	0.656673	0.428515
YPL094C	SEC62	SECretory	0.240565	1.75763
YLR185W	RPL37A	Ribosomal Protein of the Large subunit	0.474072	0.746011
YDR002W	YRB1	Yeast Ran Binder	0.203472	0.248152
YPR191W	QCR2	QH2:cytochrome-C oxidoReductase	0.210302	0.475937
YER006W	NUG1	NUclear GTPase	0.679265	0.492199
YKR045C			0.568267	0.603621
YNL062C	GCD10	General Control Derepressed	0.657601	0.587738
YLR129W	DIP2	DOM34 Interacting Protein	0.596069	0.408311
YOR272W	YTM1		0.695339	0.476159
YOL040C	RPS15	Ribosomal Protein of the Small subunit	0.637024	0.745745
YDL061C	RPS29B	Ribosomal Protein of the Small subunit	0.513375	0.696905
YDL083C	RPS16B	Ribosomal Protein of the Small subunit	0.552175	0.827945
YAL039C	CYC3	CYtochrome C	0.243787	0.676098
YBR197C			0.384677	0.433597
YOR167C	RPS28A	Ribosomal Protein of the Small subunit	0.521165	0.590931
YDR382W	RPP2B	Ribosomal Protein P2 Beta	0.517284	0.525511
YDR365C	ESF1	Eighteen S rRNA Factor	0.658762	0.440634
YJR129C	EFM3	Elongation Factor Methyltransferase	0.6155	0.433155
YKL143W	LTV1	Low Temperature Viability	0.596851	0.614128
YDL205C	HEM3	HEMe biosynthesis	0.329847	0.248779
YDL081C	RPP1A	Ribosomal Protein P1 Alpha	0.541178	0.438764
YIL019W	FAF1	Forty (40) S Assembly Factor	0.973544	0.596118
YHR204W	MNL1	MaNnosidase-Like protein	0.284965	0.335694
YPL042C	SSN3	Suppressor of SNf1	0.205946	0.211014
YDL201W	TRM8	Transfer RNA Methyltransferase	0.822962	0.530208
YPL108W			0.490498	2.24359
YNL069C	RPL16B	Ribosomal Protein of the Large subunit	0.477928	0.663236
YDR500C	RPL37B	Ribosomal Protein of the Large subunit	0.378423	0.532178
YER131W	RPS26B	Ribosomal Protein of the Small subunit	0.668463	0.76366
YDR172W	SUP35	SUPpressor	0.342154	0.19821
YJR024C	MDE1	Methylthioribulose-1-phosphate DEhydratase	0.351253	0.379367
YCL029C	BIK1	BIlateral Karyogamy defect	0.415869	0.311448
YER056C-A	RPL34A	Ribosomal Protein of the Large subunit	0.550942	0.847756
YML125C	PGA3	Processing of Gas1p and ALP	0.257267	0.614786
YGR103W	NOP7	NucleOlar Protein	0.543985	0.442795
YLR061W	RPL22A	Ribosomal Protein of the Large subunit	0.646368	0.894796
YMR276W	DSK2		0.223697	0.360177
YLR044C	PDC1	Pyruvate DeCarboxylase	0.47685	0.41565
YBL030C	PET9	PETite	0.243537	0.21818
YKL021C	MAK11	MAintenance of Killer	0.542657	0.364752
YNL240C	NAR1	Nuclear Architecture Related	0.366362	0.420804
YGR027C	RPS25A	Ribosomal Protein of the Small subunit	0.434454	0.720609
YGL171W	ROK1	Rescuer Of Kem1	0.575717	0.429117
Q0105	COB	CytochrOme B	0.450322	0.667273
YLR105C	SEN2	Splicing ENdonuclease	0.388737	0.369915
YDR144C	MKC7	Multicopy suppressor of Kex2 Cold sensitivity	0.386004	0.447634
YIL094C	LYS12	LYSine requiring	0.452023	0.779212
YOR077W	RTS2		0.379685	0.454759
YNR053C	NOG2	NucleOlar G-protein	0.751422	0.823528
YKL180W	RPL17A	Ribosomal Protein of the Large subunit	0.539283	0.688996
YBR191W	RPL21A	Ribosomal Protein of the Large subunit	0.56133	0.760249
YML082W			0.326837	0.398811
YKR092C	SRP40	Serine Rich Protein	0.68326	0.838815
YCL036W	GFD2	Great for Full DEAD box protein activity	1.15862	1.09377
Q0060	AI3		0.472783	0.633526
YLR388W	RPS29A	Ribosomal Protein of the Small subunit	0.428895	0.526387
YOR361C	PRT1	PRoTein synthesis	0.368485	0.217
YLL008W	DRS1	Deficiency of Ribosomal Subunits	0.839526	0.475006
YPL111W	CAR1	Catabolism of ARginine	0.695058	1.37523
YOL061W	PRS5	PhosphoRibosylpyrophosphate Synthetase	0.303571	0.183314
YER043C	SAH1	S-Adenosyl-l-Homocysteine hydrolase	0.238974	0.293393
YDL014W	NOP1	NucleOlar Protein	0.714323	0.46541
YCR047C	BUD23	BUD site selection	0.764654	0.835176
YIL103W	DPH1	DiPHthamide biosynthesis	0.681316	0.425532
YBR141C	BMT2	Base MethylTransferase of 25S RNA	0.572212	0.566935
YIR012W	SQT1	Suppressor of QSR1 Truncations	0.474331	0.349451
YKR048C	NAP1	Nucleosome Assembly Protein	0.43962	0.418804
YLR056W	ERG3	ERGosterol biosynthesis	0.521925	0.674539
YBL027W	RPL19B	Ribosomal Protein of the Large subunit	0.588795	0.774364
YCL018W	LEU2	LEUcine biosynthesis	0.625221	0.677924
YHR203C	RPS4B	Ribosomal Protein of the Small subunit	0.490606	0.60198
YHR020W			0.426371	0.292934
YGL099W	LSG1	Large-Subunit Gtpase	0.538339	0.397388
YOR095C	RKI1	Ribose-5-phosphate Ketol-Isomerase	0.73864	0.808138
YNL075W	IMP4	Interacting with Mpp10p	0.54063	0.337071
YHR089C	GAR1	Glycine Arginine Rich	0.80733	0.521942
YMR116C	ASC1	Absence of growth Suppressor of Cyp1	0.441575	0.835846
YNR018W	RCF2	Respiratory superComplex Factor	0.631098	0.817081
YHR129C	ARP1	Actin-Related Protein	0.420585	0.465598
YCL054W	SPB1	Suppressor of PaB1 mutant	0.698197	0.540891
YDR412W	RRP17	Ribosomal RNA Processing	0.756795	0.501713
YOL121C	RPS19A	Ribosomal Protein of the Small subunit	0.623621	0.806295
YNL151C	RPC31	RNA Polymerase C	0.626658	0.416239
YNR003C	RPC34	RNA Polymerase C	0.59044	0.541536
YCR072C	RSA4	RiboSome Assembly	0.801569	0.65044
YBR172C	SMY2	Suppressor of MYo2-66	0.336775	0.171868
YDR471W	RPL27B	Ribosomal Protein of the Large subunit	0.565477	0.775743
YIL009W	FAA3	Fatty Acid Activation	0.315528	0.741994
YPR034W	ARP7	Actin-Related Protein	0.251526	0.29614
YOR271C	FSF1	Fungal SideroFlexin 1	0.594374	0.564819
YIL148W	RPL40A	Ribosomal Protein of the Large subunit	0.430804	0.656078
YLR048W	RPS0B	Ribosomal Protein of the Small subunit	0.526096	0.523628
YGL211W	NCS6	Needs Cla4 to Survive	0.399777	0.356861
YGR185C	TYS1	TYrosyl-tRNA Synthetase	0.236182	0.189386
Q0045	COX1	Cytochrome c OXidase	0.450172	0.624471
YLR449W	FPR4	FKBP Proline Rotamase (isomerase)	0.642211	0.658316
YBR091C	TIM12	Translocase of the Inner Membrane	0.43581	0.653158
YOR145C	PNO1	Partner of NOb1	0.623422	0.380805
YOR287C	RRP36	Ribosomal RNA Processing	0.801085	0.859241
YML008C	ERG6	ERGosterol biosynthesis	0.296015	0.717217
YGL088W			0.6991	0.953679
YNR024W	MPP6	M-Phase Phosphoprotein 6 homolog	0.616538	0.519398
YLR221C	RSA3	RiboSome Assembly	0.429428	0.492514
YNL244C	SUI1	SUppressor of Initiator codon	0.366993	0.289017
YHL015W	RPS20	Ribosomal Protein of the Small subunit	0.468459	0.644257
YGR214W	RPS0A	Ribosomal Protein of the Small subunit	0.515043	0.552512
Q0070	AI5_ALPHA		0.45587	0.610523
YMR260C	TIF11	Translation Initiation Factor	0.418913	0.318326
YDL191W	RPL35A	Ribosomal Protein of the Large subunit	0.494778	0.58959
YFR037C	RSC8	Remodel the Structure of Chromatin	0.218523	0.343131
YLR264W	RPS28B	Ribosomal Protein of the Small subunit	0.621393	0.931442
YMR239C	RNT1	RNase Three	0.566549	0.468651
YPL086C	ELP3	ELongator Protein	0.533355	1.95374
YDR450W	RPS18A	Ribosomal Protein of the Small subunit	0.513646	0.568647
YGL189C	RPS26A	Ribosomal Protein of the Small subunit	0.587099	0.718898
YPR069C	SPE3	SPErmidine auxotroph	0.308459	0.392003
YBR061C	TRM7	Transfer RNA Methyltransferase	0.579958	0.288247
YIR026C	YVH1	Yeast vaccinia virus VH1 Homolog	0.744646	0.577025
YER102W	RPS8B	Ribosomal Protein of the Small subunit	0.548846	0.798354
YHR010W	RPL27A	Ribosomal Protein of the Large subunit	0.472123	0.648521
YKL120W	OAC1	OxaloAcetate Carrier	0.748272	1.21287
YMR142C	RPL13B	Ribosomal Protein of the Large subunit	0.457495	0.630549
YAL036C	RBG1	RiBosome interacting Gtpase	0.690448	0.627145
YKL082C	RRP14	Ribosomal RNA Processing	0.572224	0.466578
YOR308C	SNU66	Small NUclear ribonucleoprotein associated	0.246326	0.240598
YHR143W-A	RPC10	RNA Polymerase C	0.35251	0.497902
YJL130C	URA2	URAcil requiring	0.289669	0.294954
YDR023W	SES1	SEryl-tRNA Synthetase	0.291223	0.296155
YIL127C	RRT14	Regulator of rDNA Transcription	0.742156	0.505312
YBL068W	PRS4	PhosphoRibosylpyrophosphate Synthetase	0.450245	0.337545
YLR448W	RPL6B	Ribosomal Protein of the Large subunit	0.590014	0.764459
YDL082W	RPL13A	Ribosomal Protein of the Large subunit	0.459529	0.562539
YBR160W	CDC28	Cell Division Cycle	0.261527	0.298519
YGR081C	SLX9		0.726534	0.375083
YMR006C	PLB2	PhosphoLipase B	1.21238	1.07116
YHR062C	RPP1	Ribonuclease P Protein	0.735553	0.703515
YBR189W	RPS9B	Ribosomal Protein of the Small subunit	0.55315	0.827042
YHR003C	TCD1	tRNA ThreonylCarbamoyladenosine Dehydratase	0.414898	0.284068
YJL050W	MTR4	Mrna TRansport	0.664669	0.391631
YHR208W	BAT1	Branched-chain Amino acid Transaminase	0.639149	0.803283
YLR051C	FCF2	Faf1p Copurifying Factor	0.455481	0.433652
YLR121C	YPS3	YaPSin	0.484839	0.717767
YCR060W	TAH1	Tpr-containing protein Associated with Hsp90	0.603224	1.01975
YLR130C	ZRT2	Zinc-Regulated Transporter	0.475851	0.951824
YDR234W	LYS4	LYSine requiring	0.644995	0.741155
YOR127W	RGA1	Rho GTPase Activating Protein	0.177785	0.282169
YJL186W	MNN5	MaNNosyltransferase	0.275582	0.362904
YJL198W	PHO90	PHOsphate metabolism	0.368173	0.266337
YKL186C	MTR2	Mrna TRansport	0.347558	0.30959
YCL059C	KRR1	contains KRR-R motif	0.674719	0.444252
YBR191W-A			0.558941	0.631583
YDR385W	EFT2	Elongation Factor Two	0.520807	0.511413
YDL153C	SAS10	Something About Silencing	0.630088	0.483981
YDL150W	RPC53	RNA Polymerase C	0.454751	0.360152
YML093W	UTP14	U Three Protein	0.769538	0.570472
YLL018C-A	COX19	Cytochrome c OXidase	0.458819	0.383963
YDR398W	UTP5	U Three Protein	0.43731	0.380076
YER127W	LCP5	Lethal with Conditional Pap1	0.65166	0.471188
YPL266W	DIM1	DIMethylase	0.691687	0.560352
YCL011C	GBP2	G-strand Binding Protein	0.228527	0.157495
YIL022W	TIM44	Translocase of the Inner Mitochondrial membrane	0.241587	0.242592
YDR101C	ARX1	Associated with Ribosomal eXport complex	0.585254	0.412372
YIL145C	PAN6	PANtothenate biosynthesis	0.243035	0.277315
YBR261C	TAE1	Translation Associated Element	0.435977	0.50743
YPR102C	RPL11A	Ribosomal Protein of the Large subunit	0.452428	0.545651
YBL042C	FUI1	5-FlUorourIdine resistance	0.732901	0.688313
YEL034W	HYP2	HYPusine-containing protein	0.291426	0.396656
YGR159C	NSR1		0.63671	0.706981
YGR285C	ZUO1	ZUOtin	0.450496	0.318829
YMR128W	ECM16	ExtraCellular Mutant	0.634635	0.347587
YJL177W	RPL17B	Ribosomal Protein of the Large subunit	0.62331	0.67582
YPL101W	ELP4	ELongator Protein	0.2253	1.66253
YGL040C	HEM2	HEMe biosynthesis	0.229734	0.299809
YLR073C	RFU1	Regulator of Free Ubiquitin chains	0.638687	0.820253
YGL030W	RPL30	Ribosomal Protein of the Large subunit	0.47199	0.734057
YNR029C			0.511971	0.5251
YPR074C	TKL1	TransKetoLase	0.239711	0.402672
YIL063C	YRB2	Yeast Ran Binder	0.304095	0.254122
YER074W	RPS24A	Ribosomal Protein of the Small subunit	0.559934	0.765626
YMR319C	FET4	FErrous Transport	0.68378	0.524665
YCL058W-A	ADF1	Antisense of Depressing Factor	1.00209	0.790435
YDL136W	RPL35B	Ribosomal Protein of the Large subunit	0.501308	0.475829
YPL079W	RPL21B	Ribosomal Protein of the Large subunit	0.417915	0.652825
YHR149C	SKG6	Suppressor of lethality of Kex2 Gas1 double null mutant	0.3411	0.700899
YER025W	GCD11	General Control Derepressed	0.345429	0.197474
YOR056C	NOB1	Nin1 (One) Binding protein	0.513745	0.327366
YBR034C	HMT1	HnRNP MethylTransferase	0.371104	0.413664
YCR031C	RPS14A	Ribosomal Protein of the Small subunit	0.520937	0.752132
YHR169W	DBP8	Dead Box Protein	0.609399	0.313555
YGR158C	MTR3	MRNA TRansport	0.550097	0.45148
YPR112C	MRD1	Multiple RNA-binding domain	0.730324	0.479592
YOR212W	STE4	STErile	0.378587	0.532977
YNL110C	NOP15	NucleOlar Protein	0.638647	0.489939
YPR163C	TIF3	Translation Initiation Factor	0.505802	0.382337
YML042W	CAT2	Carnitine AcetylTransferase	0.339685	0.318841
YHL008C			0.965144	0.934891
YLR009W	RLP24	Ribosomal-Like Protein	0.685673	0.471291
YAL019W	FUN30	Function Unknown Now	0.464061	0.306054
YNL066W	SUN4	Sim1 Uth1 Nca3	0.260662	0.409706
YPR132W	RPS23B	Ribosomal Protein of the Small subunit	0.51187	0.734487
YLR153C	ACS2	Acetyl CoA Synthetase	0.273298	0.382674
YBL028C			0.687456	0.556427
YLR074C	BUD20	BUD site selection	0.543032	0.802583
YKR024C	DBP7	Dead Box Protein	0.714803	0.51122
YJL190C	RPS22A	Ribosomal Protein of the Small subunit	0.54124	0.752326
YBR142W	MAK5	MAintenance of Killer	0.51062	0.469089
YOR159C	SME1	Sm protein E	0.456601	0.560442
YBR247C	ENP1	Essential Nuclear Protein	0.680829	0.444728
YKR026C	GCN3	General Control Nonderepressible	0.379501	0.364415
YMR194W	RPL36A	Ribosomal Protein of the Large subunit	0.361696	0.51352
YBL072C	RPS8A	Ribosomal Protein of the Small subunit	0.601523	0.775103
YER159C	BUR6	Bypass UAS Requirement	0.606273	0.557333
YCR052W	RSC6	Remodel the Structure of Chromatin	0.255843	0.36547
YDL133C-A	RPL41B	Ribosomal Protein of the Large subunit	0.753985	1.05966
YGL019W	CKB1	Casein Kinase Beta subunit	0.429661	0.413769
YGR245C	SDA1	Severe Depolymerization of Actin	0.772982	0.435319
YEL058W	PCM1	PhosphoaCetylglucosamine Mutase	0.262846	0.537915
YLR172C	DPH5	DiPHthamide	0.433993	0.500098
YBL087C	RPL23A	Ribosomal Protein of the Large subunit	0.574035	0.66577
Q0120	BI4		0.457722	0.594104
YPL212C	PUS1	PseudoUridine Synthase	0.341218	0.330541
YPL181W	CTI6	Cyc8-Tup1 Interacting protein	0.404867	0.499589
YOL077C	BRX1	Xenopus laevis Brix (Biogenesis of Ribosomes in Xenopus) homolog	0.734051	0.394104
YKL183W	LOT5	LOw Temperature-responsive	0.380964	0.749556
YGR118W	RPS23A	Ribosomal Protein of the Small subunit	0.510527	0.65591
YKL182W	FAS1	Fatty Acid Synthetase	0.374604	0.320837
YGR169C-A	LSO2	Late-annotated Small Open reading frame	0.427398	0.590944
YGR078C	PAC10	Perish in the Absence of Cin8p	0.37225	0.45308
YIL052C	RPL34B	Ribosomal Protein of the Large subunit	0.522537	0.723897
YNL175C	NOP13	NucleOlar Protein	0.747196	0.583385
YDL130W	RPP1B	Ribosomal Protein P1 Beta	0.404518	0.74102
YGR148C	RPL24B	Ribosomal Protein of the Large subunit	0.509618	0.635033
YPR010C	RPA135	RNA Polymerase A	0.610487	0.510571
YJR072C	NPA3	Nucleolar Preribosomal Associated	0.514674	0.591254
YOR310C	NOP58	NucleOlar Protein of 58 kDa	0.51744	0.391144
YPL092W	SSU1	Sensitive to SUlfite	1.52187	0.486509
YOR133W	EFT1	Elongation Factor Two	0.346041	0.302769
YFL023W	BUD27	BUD site selection	0.857745	0.53491
YKR025W	RPC37	RNA Polymerase C	0.340159	0.305481
YBR031W	RPL4A	Ribosomal Protein of the Large subunit	0.743443	0.597688
YLR441C	RPS1A	Ribosomal Protein of the Small subunit	0.481614	0.747216
YGR145W	ENP2	Essential Nuclear Protein	0.686178	0.519679
YDR447C	RPS17B	Ribosomal Protein of the Small subunit	0.660417	0.868986
YMR093W	UTP15	U Three Protein	0.6004	0.366446
YOL027C	MDM38	Mitochondrial Distribution and Morphology	0.183204	0.190169
YJL208C	NUC1	NUClease	0.41367	0.417107
YIL161W			0.309186	0.370498
YOR224C	RPB8	RNA Polymerase B	0.518558	0.442992
YLR015W	BRE2	BREfeldin A sensitivity	0.461642	0.481735
YBR084W	MIS1	MItochondrial C1-tetrahydrofolate Synthase	0.457621	0.412606
YLR355C	ILV5	IsoLeucine-plus-Valine requiring	0.469759	1.0562
YHL011C	PRS3	PhosphoRibosylpyrophosphate Synthetase	0.483194	0.318755
YPL098C	MGR2	Mitochondrial Genome Required	0.281041	1.90971
YNL308C	KRI1	KRR1-Interacting protein	0.635914	0.438799
YNL227C	JJJ1	J-protein (Type III)	0.506001	0.677568
YDR397C	NCB2	Negative Cofactor B	0.453303	0.687157
YPL217C	BMS1	BMh Sensitive	0.635202	0.428183
YLR244C	MAP1	Methionine AminoPeptidase	0.40096	0.257191
YOR234C	RPL33B	Ribosomal Protein of the Large subunit	0.424725	0.491458
YDR465C	RMT2	aRginine MeThyltransferase	0.502439	0.504037
YKR057W	RPS21A	Ribosomal Protein of the Small subunit	0.630854	0.882493
YDL031W	DBP10	Dead Box Protein	0.587378	0.281209
YDR514C			0.431126	0.310549
YEL077C			0.281037	0.355699
YER049W	TPA1	Termination and PolyAdenylation	0.283528	0.312974
YFR001W	LOC1	LOCalization of mRNA	0.482808	0.483357
YAL035W	FUN12	Function Unknown Now	0.323016	0.205312
YPR013C	CMR3	Changed Mutation Rate	0.503459	1.27604
YHR040W	BCD1	Box C/D snoRNA accumulation	0.677801	0.548027
YLR344W	RPL26A	Ribosomal Protein of the Large subunit	0.420647	0.709344
YDR188W	CCT6	Chaperonin Containing TCP-1	0.279541	0.359556
YDR296W	MHR1	Mitochondrial Homologous Recombination	0.263202	0.467923
YKR081C	RPF2	Ribosome Production Factor	0.551283	0.513683
YLR401C	DUS3	DihydroUridine Synthase	0.832974	0.788846
YIL133C	RPL16A	Ribosomal Protein of the Large subunit	0.410387	0.596845
YGR286C	BIO2	BIOtin	0.528124	0.813017
YIL104C	SHQ1	Small nucleolar RNAs of the box H/ACA family Quantitative accumulation	0.674243	0.570508
YNL282W	POP3	Processing Of Precursor RNAs	0.975539	0.801866
YPL131W	RPL5	Ribosomal Protein of the Large subunit	0.652942	0.823897
YER156C	MYG1		0.462786	0.356935
YGR283C			0.811287	0.521808
YHR070W	TRM5	tRNA Methyltransferase	0.520417	0.550294
YPL043W	NOP4	NucleOlar Protein	0.797911	0.598276
YNR050C	LYS9	LYSine requiring	0.419835	0.943955
YMR213W	CEF1	CErevisiae homolog of cdc Five	0.302955	0.204183
YDL156W	CMR1	Changed Mutation Rate	0.287574	0.294884
YLR196W	PWP1	Periodic tryptophan (W) Protein	0.616519	0.660981
YPL207W	TYW1	Trna-YW synthesizing protein	0.532793	0.405523
YDR190C	RVB1	RuVB-like	0.348025	0.243668
YBL039C	URA7	URAcil requiring	0.767218	0.5634
YLR432W	IMD3	IMP Dehydrogenase	0.60861	0.602349
YBR084C-A	RPL19A	Ribosomal Protein of the Large subunit	0.562574	0.736466
YDR161W	ACL4	Assembly Chaperone of RpL4	0.551699	0.308882
YOL021C	DIS3	homolog of S. pombe dis3 (chromosome DISjunction)	0.336755	0.189715
YGL111W	NSA1	Nop Seven Associated	0.623334	0.463607
YDR025W	RPS11A	Ribosomal Protein of the Small subunit	0.512725	0.707509
YLR325C	RPL38	Ribosomal Protein of the Large subunit	0.495939	0.728964
YNL248C	RPA49	RNA Polymerase A	0.742356	0.495636
YER126C	NSA2	Nop Seven Associated	0.842012	0.453765
YEL036C	ANP1	ANP and osmotic sensitive	0.323472	0.295063
YAL059W	ECM1	ExtraCellular Mutant	0.929335	0.609565
YKR043C	SHB17	SedoHeptulose 1,7-Bisphosphatase	0.287114	0.66269
YKL081W	TEF4	Translation Elongation Factor	0.41189	0.450492
YER082C	UTP7	U Three Protein	0.563673	0.468857
YDL208W	NHP2	Non-Histone Protein	0.531731	0.419848
YGL255W	ZRT1	Zinc-Regulated Transporter	1.12615	1.10703
YLR055C	SPT8	SuPpressor of Ty	0.303808	0.318901
YML056C	IMD4	IMP Dehydrogenase	0.862209	0.492189
YPL093W	NOG1	NucleOlar G-protein	0.5644	1.95089
YMR277W	FCP1	tfiiF-associating component of Ctd Phosphatase	0.319436	0.277497
YNL255C	GIS2	GIg Suppressor	0.493022	0.373303
YPL160W	CDC60	Cell Division Cycle	0.303304	0.237759
YOR101W	RAS1	homologous to RAS proto-oncogene	0.538643	0.795604
YGL031C	RPL24A	Ribosomal Protein of the Large subunit	0.598208	0.708644
YNR054C	ESF2	Eighteen S rRNA Factor 2	0.630965	0.527882
YML113W	DAT1	DATin	0.585753	0.787863
YLR175W	CBF5	Centromere Binding Factor	0.550054	0.286042
YCL037C	SRO9	Suppressor of rho3	0.662251	0.705093
YOL066C	RIB2	RIBoflavin biosynthesis	0.296373	0.276696
YJL033W	HCA4	Helicase CA	0.682213	0.530624
YOR309C			0.606605	0.400559
YNL302C	RPS19B	Ribosomal Protein of the Small subunit	0.520191	0.701545
YLR222C	UTP13	U Three Protein	0.581758	0.327441
YNL030W	HHF2	Histone H Four	0.30134	0.301665
YLL036C	PRP19	Pre-RNA Processing	0.254388	0.237222
YNL113W	RPC19	RNA Polymerase C	0.386751	0.40142
YOL097C	WRS1	W (tryptophan) RS (tRNA synthetase)	0.385455	0.330674
YDL229W	SSB1	Stress-Seventy subfamily B	0.607162	0.606493
YOL125W	TRM13	TRna Methyltransferase	0.60822	0.368277
YLR167W	RPS31	Ribosomal Protein of the Small subunit	0.669304	0.948109
YBL092W	RPL32	Ribosomal Protein of the Large subunit	0.579679	0.717976
YER117W	RPL23B	Ribosomal Protein of the Large subunit	0.452071	0.7596
YOL086C	ADH1	Alcohol DeHydrogenase	0.347089	0.491941
YLR409C	UTP21	U Three Protein	0.640638	0.444788
YLR150W	STM1	Suppressor of ToM1	0.516051	0.639688
YKR094C	RPL40B	Ribosomal Protein of the Large subunit	0.451934	0.487427

## Sheet: Overlap Fig 5B Downregulated
			Log2 fold change
Systematic name	Standard name	Gene name	ycg1Degron2 vs control in Met + Auxin	Met + Auxin vs Untreated in ycg1Degron2
YCL050C	APA1	AP4A phosphorylase	-0.372981	-0.636759
YLR031W			-0.881714	-1.44368
YKL193C	SDS22	homolog of S. pombe SDS22	-0.373674	-0.221331
YKL025C	PAN3	Poly(A) Nuclease	-0.301983	-0.235029
YKR011C			-0.761935	-0.319281
YKL010C	UFD4	Ubiquitin Fusion Degradation protein	-0.177297	-0.380921
YBR041W	FAT1	FATty acid transporter	-0.161266	-0.149011
YGR161C	RTS3	0	-0.562989	-0.880938
YDL113C	ATG20	AuTophaGy related	-0.221996	-0.378586
YER052C	HOM3	HOMoserine requiring	-1.13263	-1.1038
YBR169C	SSE2	Stress Seventy subfamily E	-0.620034	-1.09548
YMR031C	EIS1	EISosome	-0.307936	-0.496003
YPL260W	CUB1	Cu2+ suppressing and Bleomycin sensitive	-0.26164	-0.267425
YEL065W	SIT1	Siderophore Iron Transport	-0.553153	-0.807901
YDR078C	SHU2	Suppressor of HydroxyUrea sensitivity	-0.965301	-1.07113
YIL048W	NEO1	NEOmycin-resistance	-0.218369	-0.323394
YKL100C	YPF1	Yeast Presenilin-like Family 1	-0.336428	-0.346649
YLR251W	SYM1	Stress-inducible Yeast Mpv17	-0.791091	-0.957026
YEL063C	CAN1	CANavanine resistance	-0.65478	-0.29002
YLR273C	PIG1	Protein Interacting with Gsy2p	-0.376332	-0.276983
YKL188C	PXA2	PeroXisomal ABC-transporter	-0.239153	-0.31647
YPL219W	PCL8	Pho85 CycLin	-0.320644	-0.369701
YOR386W	PHR1	PHotoreactivation Repair deficient	-0.281277	-0.213201
YDR171W	HSP42	Heat Shock Protein	-0.389991	-0.642708
YGR161W-C			-0.543101	-0.426141
YML116W	ATR1	AminoTriazole Resistance	-0.570923	-0.618021
YNL257C	SIP3	SNF1-Interacting Protein	-0.276976	-0.231805
YIL056W	VHR1	VHt1 Regulator	-0.631733	-0.962832
YDR258C	HSP78	Heat Shock Protein	-0.690064	-0.995288
YMR304W	UBP15	UBiquitin-specific Protease	-0.248647	-0.223384
YLR064W	PER33	Pore and ER protein, 33 kDa	-0.417986	-0.939336
YGL184C	STR3	Sulfur TRansfer	-4.18758	-1.83105
YOR184W	SER1	SERine requiring	-1.26109	-0.523268
YGL227W	VID30	Vacuolar Import and Degradation	-0.256408	-0.22174
YDL198C	GGC1	GDP/GTP Carrier	-0.337532	-0.68068
YBR298C	MAL31	MALtose fermentation	-0.396896	-0.434965
YML130C	ERO1	ER Oxidation or Endoplasmic Reticulum Oxidoreductin	-0.404137	-0.839127
YMR095C	SNO1	SNZ proximal Open reading frame	-2.2044	-1.7396
YOR076C	SKI7	SuperKIller	-0.332394	-0.403954
YDL160C	DHH1	DEAD box Helicase Homolog	-0.184003	-0.263231
YOR120W	GCY1	Galactose-inducible Crystallin-like Yeast protein	-0.619373	-0.476292
YNL129W	NRK1	Nicotinamide Riboside Kinase	-0.652943	-1.27001
YOR044W	IRC23	Increased Recombination Centers	-0.62458	-0.681091
YMR062C	ARG7	ARGinine requiring	-0.381759	-0.947184
YJL060W	BNA3	Biosynthesis of Nicotinic Acid	-2.34099	-0.748963
YDR223W	CRF1	Co-Repressor with FHL1	-1.40273	-2.03337
YDL239C	ADY3	Accumulation of DYads	-0.509185	-0.786567
YDR380W	ARO10	AROmatic amino acid requiring	-0.720049	-2.47706
YOL164W	BDS1	Bacterially Derived Sulfatase	-2.86669	-0.862861
YOR173W	DCS2	DeCapping Scavenger	-0.455902	-0.698482
YER103W	SSA4	Stress-Seventy subfamily A	-1.09802	-1.39714
YLR260W	LCB5	Long-Chain Base	-0.230323	-0.194637
YGL193C			-0.682239	-0.708826
YOR354C	MSC6	Meiotic Sister-Chromatid recombination	-0.286469	-0.231751
YKR098C	UBP11	UBiquitin-specific Protease	-0.299024	-0.327741
YKL218C	SRY1	Serine Racemase of Yeast	-0.704725	-0.344277
YGL082W			-0.186579	-0.235294
YGR204W	ADE3	ADEnine requiring	-0.834911	-0.417094
YPR106W	ISR1	Inhibition of Staurosporine Resistance	-0.615198	-0.548962
YOL083W	ATG34	AuTophaGy related	-0.499186	-0.392771
YGL125W	MET13	METhionine requiring	-1.88682	-0.422792
YDR407C	TRS120	TRapp Subunit	-0.291018	-0.320032
YHR137W	ARO9	AROmatic amino acid requiring	-0.748423	-1.5502
YDL215C	GDH2	Glutamate DeHydrogenase	-0.457776	-0.779783
YJL094C	KHA1	K/H ion Antiporter	-0.478287	-0.589954
YDR427W	RPN9	Regulatory Particle Non-ATPase	-0.470908	-0.345625
YDR251W	PAM1	Pp2A Multicopy suppressor	-0.310182	-0.383419
YGR019W	UGA1	Utilization of GAba	-0.275366	-0.495569
YBR101C	FES1	Factor Exchange for Ssa1p	-0.38896	-0.730687
YIL017C	VID28	Vacuolar Import and Degradation	-0.350016	-0.4107
YLR216C	CPR6	Cyclosporin-sensitive Proline Rotamase	-0.233347	-0.528292
YNR069C	BSC5	Bypass of Stop Codon	-0.847449	-0.945866
YDR003W-A			-0.675165	-0.904655
YOL032W	OPI10	OverProducer of Inositol	-0.488538	-0.937075
YDR425W	SNX41	Sorting NeXin	-0.462583	-0.459432
YNL159C	ASI2	Amino acid Sensor-Independent	-0.298122	-0.330337
YMR139W	RIM11	Regulator of IME2	-0.433229	-0.201671
YKL201C	MNN4	MaNNosyltransferase	-2.71667	-0.815072
YLR396C	VPS33	Vacuolar Protein Sorting	-0.246066	-0.212454
YLL056C			-1.36878	-0.8247
YOR261C	RPN8	Regulatory Particle Non-ATPase	-0.284551	-0.187745
YDR295C	HDA2	Histone DeAcetylase	-0.361544	-0.293362
YER021W	RPN3	Regulatory Particle Non-ATPase	-0.251316	-0.162184
YDL106C	PHO2	PHOsphate metabolism	-0.259482	-0.283946
YGR197C	SNG1		-0.735802	-1.63422
YDR505C	PSP1	Polymerase SuPpressor	-0.330352	-0.214252
YNL041C	COG6	Conserved Oligomeric Golgi complex	-0.277559	-0.405709
YOR137C	SIA1	Suppressor of eIF5A	-0.300533	-0.259674
YNL287W	SEC21	SECretory	-0.268715	-0.262839
YIL165C			-1.36802	-0.549702
YOR227W	HER1	Hmg2p ER Remodeling	-0.343957	-0.341398
YGR065C	VHT1	Vitamin H Transporter	-0.528663	-0.614012
YBL088C	TEL1	TELomere maintenance	-0.294762	-0.406371
YMR096W	SNZ1	SNooZe	-0.95681	-0.99435
YJL212C	OPT1	OligoPeptide Transporter	-2.6401	-0.850115
YKL035W	UGP1	UDP-glucose pyrophosphorylase	-0.563714	-0.589601
YDR141C	DOP1	homolog of A. nidulans DOPey	-0.205765	-0.291812
YEL031W	SPF1	Sensitivity to Pichia Farinosa killer toxin	-0.149137	-0.169754
YGR249W	MGA1		-1.27333	-1.16959
YGR198W	YPP1	alpha-sYnuclein Protective Protein	-0.305042	-0.723958
YOL163W			-2.61171	-1.41949
YGR250C	RIE1	Restoration of Impaired growths of ERMES-lacking cells	-0.249616	-0.669385
YOL162W			-2.22509	-1.34366
YDL206W			-0.46257	-0.589283
YJL207C	LAA1	Large AP-1 Accessory	-0.378843	-0.460299
YHR104W	GRE3	Genes de Respuesta a Estres (stress responsive genes)	-0.564724	-0.664224
YGR154C	GTO1	Glutathione Transferase Omega-like	-1.6991	-0.95257
YDR151C	CTH1	Cysteine-Three-Histidine	-0.349427	-0.682136
YMR231W	PEP5	carboxyPEPtidase Y-deficient	-0.239353	-0.199152
YNR068C			-1.22943	-1.19337
YDL190C	UFD2	Ubiquitin Fusion Degradation	-0.34822	-0.368964
YLL026W	HSP104	Heat Shock Protein	-0.399107	-0.554723
YPR036W-A	SPO24	SPOrulation	-0.485509	-0.848659
YPL020C	ULP1	UbL-specific Protease	-0.26766	-0.298502
YLR450W	HMG2	3-Hydroxy-3-MethylGlutaryl-coenzyme a reductase	-0.214241	-0.258741
YNL183C	NPR1	Nitrogen Permease Reactivator	-0.400046	-0.224671
YLL040C	VPS13	Vacuolar Protein Sorting	-0.223232	-0.212232
YEL071W	DLD3	D-Lactate Dehydrogenase	-0.717521	-0.570902
YGR157W	CHO2	CHOline requiring	-0.787677	-0.810943
YPL154C	PEP4	carboxyPEPtidase Y-deficient	-0.340693	-0.290376
YDR253C	MET32	METhionine requiring	-4.43525	-1.17246
YOL126C	MDH2	Malate DeHydrogenase	-0.371271	-0.324765
YER079W			-0.727562	-1.15006
YHL036W	MUP3	Methionine UPtake	-2.6446	-1.16078
YJL089W	SIP4	SNF1-Interacting Protein	-1.67292	-2.56267
YOR022C	DDL1	DDHD Domain-containing Lipase	-0.33035	-0.330814
YKL091C			-0.282162	-0.395513
YIL105C	SLM1	Synthetic Lethal with Mss4	-0.328749	-0.535086
YBR097W	VPS15	Vacuolar Protein Sorting	-0.334587	-0.280948
YML003W			-0.646743	-0.573529
YJR117W	STE24	STErile	-0.326096	-0.468896
YPL265W	DIP5	DIcarboxylic amino acid Permease	-0.99752	-0.959677
YDR166C	SEC5	SECretory	-0.277584	-0.384352
YDR214W	AHA1	Activator of Heat shock protein 90 ATPase	-0.287252	-0.410354
YKR021W	ALY1	Arrestin-Like Yeast protein	-0.24172	-0.381684
YNL006W	LST8	Lethal with Sec Thirteen	-0.398963	-0.959812
YPR198W	SGE1	Suppression of Gal11 Expression	-0.51929	-0.628863
YGL140C			-0.145259	-0.161313
YDR205W	MSC2	Meiotic Sister-Chromatid recombination	-0.310099	-0.280127
YMR237W	BCH1	Bud7 and Chs6 Homolog	-0.260706	-0.303156
YLL055W	YCT1	Yeast Cysteine Transporter	-3.41451	-1.18175
YGR044C	RME1	Regulator of MEiosis	-0.645781	-0.468047
YJL153C	INO1	INOsitol requiring	-1.54196	-1.046
YAL016W	TPD3	tRNA Processing Deficient	-0.196224	-0.23799
YHL016C	DUR3	Degradation of URea	-0.710823	-0.799332
YML072C	TCB3	Three Calcium and lipid Binding domains (TriCalBins)	-0.191183	-0.160721
YDR036C	EHD3		-0.337109	-0.344788
YIL097W	FYV10	Function required for Yeast Viability	-0.44241	-0.355387
YNL101W	AVT4	Amino acid Vacuolar Transport	-0.416857	-0.250842
YML100W	TSL1	Trehalose Synthase Long chain	-0.529485	-0.603656
YPR055W	SEC8	SECretory	-0.333874	-0.461069
YMR281W	GPI12	GlycosylPhosphatidylInositol anchor biosynthesis	-0.402	-0.753237
YOL058W	ARG1	ARGinine requiring	-0.359359	-0.963963
YPL022W	RAD1	RADiation sensitive	-0.202173	-0.219465
YHR171W	ATG7	AuTophaGy related	-0.773534	-0.541686
YGR142W	BTN2	BaTteN disease	-0.436084	-0.604623
YMR261C	TPS3	Trehalose Phosphate Synthase	-0.238924	-0.292157
YER035W	EDC2	Enhancer of mRNA DeCapping	-0.367708	-0.435939
YHR082C	KSP1	Kinase Suppressing Prp20-10	-0.286591	-0.53026
YMR030W	RSF1	ReSpiration Factor	-0.325342	-0.275492
YKR031C	SPO14	SPOrulation	-0.26728	-0.287465
YJR090C	GRR1	Glucose Repression-Resistant	-0.174516	-0.180884
YGL059W	PKP2	Protein Kinase of PDH	-0.264931	-0.841286
YJR139C	HOM6	HOMoserine requiring	-1.12146	-0.267964
YML089C			-2.59202	-2.47383
YLR252W			-0.615457	-0.485177
YPR167C	MET16	METhionine requiring	-2.46077	-0.522974
YDR350C	ATP22	ATPase synthase	-0.427618	-0.256755
YIL088C	AVT7	Amino acid Vacuolar Transport	-0.640658	-0.330335
YIR031C	DAL7	Degradation of Allantoin	-0.630909	-0.489451
YGR284C	ERV29	ER Vesicle	-0.51109	-0.681393
YDR170C	SEC7	SECretory	-0.138869	-0.29813
YOL064C	MET22	METhionine requiring	-1.51383	-0.584887
YGR184C	UBR1		-0.26256	-0.216788
YCR093W	CDC39	Cell Division Cycle	-0.246938	-0.181223
YNL130C	CPT1	CholinePhosphoTransferase	-0.555504	-0.69501
YPR117W			-0.309906	-0.40678
YDL180W			-0.383119	-0.708399
YPL006W	NCR1	Niemann-pick type C Related	-0.219115	-0.284387
YLR241W	CSC1	Calcium permeable Stress-gated cation Channel	-0.289844	-0.159493
YIR018W	YAP5	Yeast AP-1	-0.630168	-0.541015
YER069W	ARG5,6	ARGinine requiring	-0.395813	-0.715022
YMR204C	INP1	INheritance of Peroxisomes	-0.365681	-0.326657
YDR069C	DOA4	Degradation Of Alpha	-0.619392	-0.579451
YBR056W	MRX18	Mitochondrial oRganization of gene eXpression (MIOREX)	-0.249924	-0.237071
YIL129C	TAO3	Transcriptional Activator of OCH1	-0.173025	-0.218202
YBR138C			-0.334956	-0.409123
YBR150C	TBS1	ThiaBendazole Sensitive	-0.431842	-0.380841
YKL126W	YPK1	Yeast Protein Kinase	-0.191013	-0.430208
YBL005W	PDR3	Pleiotropic Drug Resistance	-0.509896	-0.667068
YDR216W	ADR1	Alcohol Dehydrogenase II synthesis Regulator	-0.456946	-1.00839
YGL173C	XRN1	eXoRiboNuclease	-0.176205	-0.165796
YDR438W	THI74	THIamine regulon	-0.38501	-0.654457
YGR218W	CRM1	Chromosome Region Maintenance	-0.295933	-0.452377
YJR091C	JSN1	Just Say No	-0.210618	-0.20199
YIL169C	CSS1	Condition Specific Secretion	-0.583744	-0.545159
YCL030C	HIS4	HIStidine requiring	-0.682766	-0.56056
YIL116W	HIS5	HIStidine requiring	-0.708418	-0.465679
YOR363C	PIP2	Peroxisome Induction Pathway	-0.305616	-0.533499
YGR052W	FMP48	Found in Mitochondrial Proteome	-1.50414	-1.00993
YMR182W-A	MIN3	mitochondrial MINi protein of 3 kDa	-1.09007	-1.13921
YHR123W	EPT1	EthanolaminePhosphoTransferase	-0.317036	-0.279839
YLR454W	FMP27	Found in Mitochondrial Proteome	-0.365782	-0.305303
YLL032C			-0.291505	-0.377427
YDR089W	VTC5	Vacuole Transporter Chaperone	-0.888169	-0.415632
YNL118C	DCP2	mRNA DeCaPping	-0.167157	-0.32113
YDR099W	BMH2	Brain Modulosignalin Homolog	-0.201405	-0.258718
YBR132C	AGP2	high-Affinity Glutamine Permease	-0.461826	-0.4946
YBR140C	IRA1	Inhibitory Regulator of the RAS-cAMP pathway	-0.315765	-0.365282
YPR158W	CUR1	Curing of [URe3]	-0.282559	-0.679243
YMR100W	MUB1	MUlti Budding	-0.283781	-0.372784
YOR014W	RTS1	Rox Three Suppressor	-0.249259	-0.356664
YNL007C	SIS1	SIt4 Suppressor	-0.197692	-0.3911
YLR425W	TUS1	TOR Unique function Suppressor	-0.225975	-0.220806
YNL160W	YGP1	Yeast GlycoProtein	-0.836154	-0.838769
YBR211C	AME1	Associated with Microtubules and Essential	-0.358989	-0.422633
YNL121C	TOM70	Translocase of the Outer Mitochondrial membrane	-0.192215	-0.192725
YNL225C	CNM67	Chaotic Nuclear Migration	-0.293019	-0.241435
YML034W	SRC1	Spliced mRNA and Cell cycle regulated gene	-0.425759	-0.501849
YEL025C			-0.244859	-0.314019
YKL129C	MYO3	MYOsin	-0.168405	-0.157578
YDR456W	NHX1	Na+/H+ eXchanger	-0.269428	-0.411539
YJL088W	ARG3	ARGinine requiring	-0.657617	-0.739186
YBR043C	QDR3	QuiniDine Resistance	-0.416377	-0.519812
YDL231C	BRE4	BREfeldin A sensitivity	-0.244591	-0.319892
YDR219C	MFB1	Mitochondria-associated F-Box protein	-0.253499	-0.276506
YGL206C	CHC1	Clathrin Heavy Chain	-0.18454	-0.254699
YPL149W	ATG5	AuTophaGy related	-0.817475	-0.970226
YDR255C	RMD5	Required for Meiotic nuclear Division	-0.271406	-0.21582
YOR130C	ORT1	ORnithine Transporter	-0.423851	-0.826043
YGL013C	PDR1	Pleiotropic Drug Resistance	-0.400782	-0.223447
YOL081W	IRA2	Inhibitory Regulator of the RAS-cAMP pathway	-0.635537	-1.36511
YNL297C	MON2	MONensin sensitivity	-0.339317	-0.330865
YDR335W	MSN5	Multicopy suppressor of SNf1 mutation	-0.462345	-0.442466
YLR327C	TMA10	Translation Machinery Associated	-1.17727	-0.732623
YBR293W	VBA2	Vacuolar Basic Amino acid transporter	-0.360513	-0.54013

## Sheet: Overlap Fig S5B Upregulated
			Log2 fold change
Systematic name	Standard Name	Gene Name	ycg1Degron1 vs control	ycg1Degron2 vs control
YAL035W	FUN12	Function Unknown Now	0.217914	0.205312
YAR015W	ADE1	ADEnine requiring	0.275392	0.517835
YAR071W	PHO11	PHOsphate metabolism	3.55587	4.0231
YBL009W	ALK2		0.462336	0.331914
YBL039C	URA7	URAcil requiring	0.32985	0.5634
YBL061C	SKT5		0.306378	0.194801
YBR010W	HHT1	Histone H Three	1.05855	0.457265
YBR023C	CHS3	CHitin Synthase-related	0.329223	0.427498
YBR084W	MIS1	MItochondrial C1-tetrahydrofolate Synthase	0.285738	0.412606
YBR093C	PHO5	PHOsphate metabolism	3.21722	3.29458
YBR142W	MAK5	MAintenance of Killer	0.33112	0.469089
YBR155W	CNS1	CyclophiliN Seven suppressor	0.323346	0.404903
YBR291C	CTP1	Citrate Transport Protein	1.55464	1.02964
YBR296C	PHO89	PHOsphate metabolism	1.5373	1.94958
YCL054W	SPB1	Suppressor of PaB1 mutant	0.33162	0.540891
YCL059C	KRR1	contains KRR-R motif	0.430833	0.444252
YER002W	NOP16	NucleOlar Protein	0.405018	0.373539
YER006W	NUG1	NUclear GTPase	0.264644	0.492199
YER072W	VTC1	Vacuolar Transporter Chaperone	0.973341	0.573712
YER082C	UTP7	U Three Protein	0.290832	0.468857
YER118C	SHO1	Synthetic, High Osmolarity-sensitive	0.341174	0.374353
YHR005C	GPA1	G Protein Alpha subunit	0.361788	0.544589
YHR065C	RRP3	Ribosomal RNA Processing	0.333273	0.374461
YHR136C	SPL2	Suppressor of PLc1 deletion	3.36101	5.13812
YHR215W	PHO12	PHOsphate metabolism	2.99942	2.84723
YIL019W	FAF1	Forty (40) S Assembly Factor	0.45623	0.596118
YIL064W	EFM4	Elongation Factor Methyltransferase	0.315591	0.830488
YIL094C	LYS12	LYSine requiring	0.704988	0.779212
YIL103W	DPH1	DiPHthamide biosynthesis	0.325732	0.425532
YIL121W	QDR2	QuiniDine Resistance	2.62359	2.32688
YIR026C	YVH1	Yeast vaccinia virus VH1 Homolog	0.332121	0.577025
YKL009W	MRT4	mRNA Turnover 4	0.34217	0.299654
YKL029C	MAE1	MAlic Enzyme	0.298836	0.613596
YKL143W	LTV1	Low Temperature Viability	0.40558	0.614128
YKL164C	PIR1	Protein containing Internal Repeats	1.54767	0.378593
YKR025W	RPC37	RNA Polymerase C	0.271587	0.305481
YKR034W	DAL80	Degradation of Allantoin	0.992027	1.05183
YKR039W	GAP1	General Amino acid Permease	2.2255	0.89357
YKR043C	SHB17	SedoHeptulose 1,7-Bisphosphatase	0.243285	0.66269
YKR046C	PLN1	PeriLipiN	0.352951	0.582113
YKR056W	TRM2	tRNA Methyltransferase	0.283248	0.446163
YKR081C	RPF2	Ribosome Production Factor	0.360248	0.513683
YKR092C	SRP40	Serine Rich Protein	0.370998	0.838815
YDL153C	SAS10	Something About Silencing	0.40758	0.483981
YDL208W	NHP2	Non-Histone Protein	0.203515	0.419848
YDR044W	HEM13	HEMe biosynthesis	0.281489	0.591598
YDR055W	PST1	Protoplasts-SecreTed	0.917343	0.523909
YDR101C	ARX1	Associated with Ribosomal eXport complex	0.244114	0.412372
YDR111C	ALT2	ALanine Transaminase	0.42073	0.446085
YDR121W	DPB4	DNA Polymerase B (II) subunit	0.266083	0.339109
YDR161W	ACL4	Assembly Chaperone of RpL4	0.304229	0.308882
YDR225W	HTA1	Histone h Two A	0.624082	0.409973
YDR234W	LYS4	LYSine requiring	0.809323	0.741155
YDR281C	PHM6	PHosphate Metabolism	2.49934	3.05774
YDR299W	BFR2	BreFeldin A Resistance	0.365889	0.544726
YDR365C	ESF1	Eighteen S rRNA Factor	0.376458	0.440634
YDR398W	UTP5	U Three Protein	0.236397	0.380076
YDR399W	HPT1	Hypoxanthine guanine PhosphoribosylTransferase	0.724172	1.21265
YDR461W	MFA1	Mating Factor A	1.53653	0.900827
YDR465C	RMT2	aRginine MeThyltransferase	0.325793	0.504037
YDR481C	PHO8	PHOsphate metabolism	0.325743	0.249442
YGL078C	DBP3	Dead Box Protein	0.273869	0.583006
YGL105W	ARC1	Aminoacyl-tRNA synthetase Cofactor	0.194297	0.186872
YGL111W	NSA1	Nop Seven Associated	0.227471	0.463607
YGL171W	ROK1	Rescuer Of Kem1	0.310138	0.429117
YGL255W	ZRT1	Zinc-Regulated Transporter	2.29674	1.10703
YGR020C	VMA7	Vacuolar Membrane Atpase	0.280625	0.401781
YGR103W	NOP7	NucleOlar Protein	0.427107	0.442795
YGR145W	ENP2	Essential Nuclear Protein	0.347393	0.519679
YGR159C	NSR1		0.198006	0.706981
YGR180C	RNR4	RiboNucleotide Reductase	0.25486	0.30254
YGR185C	TYS1	TYrosyl-tRNA Synthetase	0.148181	0.189386
YGR245C	SDA1	Severe Depolymerization of Actin	0.383866	0.435319
YJL012C	VTC4	Vacuolar Transporter Chaperone	0.939119	0.524843
YJL033W	HCA4	Helicase CA	0.425969	0.530624
YJL117W	PHO86	PHOsphate metabolism	0.457459	0.326611
YJL130C	URA2	URAcil requiring	0.294989	0.294954
YJL200C	ACO2	ACOnitase	0.809532	0.71116
YJR001W	AVT1	Amino acid Vacuolar Transport	0.271984	0.360234
YJR002W	MPP10	M Phase Phosphoproteins	0.341871	0.428515
YJR070C	LIA1	Ligand of eIF5A	0.222772	0.77784
YJR072C	NPA3	Nucleolar Preribosomal Associated	0.219448	0.591254
YLL008W	DRS1	Deficiency of Ribosomal Subunits	0.317286	0.475006
YLL012W	YEH1	Yeast steryl Ester Hydrolase	0.382906	0.880231
YLL034C	RIX7	RIbosome eXport	0.363957	0.466005
YLR002C	NOC3	NucleOlar Complex associated	0.346601	0.422468
YLR049C	MLO50	Mitochondrially LOcalized protein of 50 kDa	1.10064	0.765005
YLR060W	FRS1	phenylalanyl (F)-tRNA Synthetase	0.158641	0.198523
YLR129W	DIP2	DOM34 Interacting Protein	0.225067	0.408311
YLR130C	ZRT2	Zinc-Regulated Transporter	1.25133	0.951824
YLR172C	DPH5	DiPHthamide	0.311425	0.500098
YLR175W	CBF5	Centromere Binding Factor	0.292314	0.286042
YLR186W	EMG1	Essential for Mitotic Growth	0.359536	0.388223
YLR196W	PWP1	Periodic tryptophan (W) Protein	0.422854	0.660981
YLR221C	RSA3	RiboSome Assembly	0.34519	0.492514
YLR222C	UTP13	U Three Protein	0.257376	0.327441
YLR243W	GPN3	Gly-Pro-Asn (N) motif	0.306767	0.30355
YLR244C	MAP1	Methionine AminoPeptidase	0.385804	0.257191
YLR272C	YCS4	Yeast Condensin Subunit	0.311261	0.300808
YLR300W	EXG1	EXo-1,3-beta-Glucanase	1.14662	0.73227
YLR342W	FKS1	FK506 Sensitivity	0.384989	0.312644
YLR401C	DUS3	DihydroUridine Synthase	0.324836	0.788846
YLR409C	UTP21	U Three Protein	0.365037	0.444788
YLR435W	TSR2	Twenty S rRNA accumulation	0.426767	0.42711
YLR442C	SIR3	Silent Information Regulator	0.334845	0.203143
YLR449W	FPR4	FKBP Proline Rotamase (isomerase)	0.620404	0.658316
YML060W	OGG1	8-OxoGuanine Glycosylase/lyase	0.409571	0.917218
YML123C	PHO84	PHOsphate metabolism	2.30375	7.90723
YMR006C	PLB2	PhosphoLipase B	0.933684	1.07116
YMR120C	ADE17	ADEnine	0.84664	1.48525
YMR128W	ECM16	ExtraCellular Mutant	0.374189	0.347587
YMR146C	TIF34	Translation Initiation Factor	0.162972	0.327864
YMR217W	GUA1	GUanine Auxotroph	0.326194	0.359825
YMR220W	ERG8	ERGosterol biosynthesis	0.22483	0.444544
YMR239C	RNT1	RNase Three	0.370806	0.468651
YMR241W	YHM2	Yeast suppressor of HM mutant	0.555251	0.487722
YMR290C	HAS1	Helicase Associated with Set1	0.249095	0.495946
YNL061W	NOP2	NucleOlar Protein	0.334214	0.429147
YNL112W	DBP2	Dead Box Protein	0.264134	0.771489
YNL113W	RPC19	RNA Polymerase C	0.346135	0.40142
YNL145W	MFA2	Mating Factor A	0.759948	1.23531
YNL166C	BNI5	Bud Neck Involved	0.309877	0.35658
YNL175C	NOP13	NucleOlar Protein	0.353934	0.583385
YNL248C	RPA49	RNA Polymerase A	0.297445	0.495636
YNL308C	KRI1	KRR1-Interacting protein	0.370391	0.438799
YNR003C	RPC34	RNA Polymerase C	0.333549	0.541536
YNR006W	VPS27	Vacuolar Protein Sorting	0.758128	0.614037
YNR029C			0.308123	0.5251
YNR050C	LYS9	LYSine requiring	1.07139	0.943955
YNR057C	BIO4	BIOtin	0.960743	1.29392
YNR065C			0.438786	1.30929
YOL077C	BRX1	Xenopus laevis Brix (Biogenesis of Ribosomes in Xenopus) homolog	0.346147	0.394104
YOL109W	ZEO1	ZEOcin resistance	0.558703	0.417095
YOR004W	UTP23	U Three-associated Protein	0.611778	0.532031
YOR056C	NOB1	Nin1 (One) Binding protein	0.327108	0.327366
YOR128C	ADE2	ADEnine requiring	2.18582	1.29063
YOR241W	MET7	METhionine requiring	0.227984	0.258131
YOR281C	PLP2	Phosducin-Like Protein	0.286689	0.28803
YOR348C	PUT4	Proline UTilization	0.937595	1.37679
YOR356W	CIR2	Changed Intracellular Redox state	0.190483	0.626957
YPL009C	RQC2	Ribosome Quality control Complex	0.202153	0.167136
YPL019C	VTC3	Vacuolar Transporter Chaperone	1.26778	0.466982
YPL043W	NOP4	NucleOlar Protein	0.346745	0.598276
YPL048W	CAM1	Calcium And Membrane-binding protein	0.212477	0.560266
YPL086C	ELP3	ELongator Protein	0.30986	1.95374
YPL106C	SSE1	Stress Seventy subfamily E	0.228467	1.0706
YPL110C	GDE1	GlycerophosphoDiEsterase	0.339592	1.867
YPL112C	PEX25	PEroXisome related	0.235845	1.54124
YPL175W	SPT14	SuPpressor of Ty	0.253287	0.415624
YPL212C	PUS1	PseudoUridine Synthase	0.194979	0.330541
YPL217C	BMS1	BMh Sensitive	0.294048	0.428183
YPL266W	DIM1	DIMethylase	0.28915	0.560352
YPR062W	FCY1	FluoroCYtosine resistance	0.318426	0.430687
YPR075C	OPY2	Overproduction-induced Pheromone-resistant Yeast	0.306776	0.379052
YPR112C	MRD1	Multiple RNA-binding domain	0.388445	0.479592
YPR143W	RRP15	Ribosomal RNA Processing	0.357756	0.428966

## Sheet: Overlap Fig S5B Downregulated
			Log2 fold change
Systematic name	Standard Name	Gene Name	ycg1Degron1 vs control	ycg1Degron2 vs control
YAL028W	FRT2	Functionally Related to TCP1	-0.46176	-0.368231
YBL037W	APL3	clathrin Adaptor Protein complex Large chain	-0.453352	-0.36593
YBL047C	EDE1	EH Domains and Endocytosis	-0.694852	-0.190464
YBL067C	UBP13	UBiquitin-specific Protease	-0.536107	-0.418779
YBL093C	ROX3	Regulation by OXygen	-0.286543	-0.237449
YBR038W	CHS2	CHitin Synthase	-0.375049	-0.281497
YBR041W	FAT1	FATty acid transporter	-0.522318	-0.149011
YBR045C	GIP1	Glc7-Interacting Protein	-0.556795	-0.865568
YBR046C	ZTA1	ZeTA-crystallin	-1.45478	-0.469359
YBR047W	FMP23	Found in Mitochondrial Proteome	-1.39324	-0.937636
YBR056W	MRX18	Mitochondrial oRganization of gene eXpression (MIOREX)	-0.821474	-0.237071
YBR086C	IST2	Increased Sodium Tolerance	-0.392313	-0.262416
YBR096W			-0.795267	-0.402337
YBR137W			-0.51179	-0.395568
YBR145W	ADH5	Alcohol DeHydrogenase	-0.776326	-1.04398
YCR032W	BPH1	Beige Protein Homolog	-0.292534	-0.472191
YEL012W	UBC8	UBiquitin-Conjugating	-0.628632	-0.337704
YEL065W	SIT1	Siderophore Iron Transport	-0.772802	-0.807901
YEL071W	DLD3	D-Lactate Dehydrogenase	-0.376061	-0.570902
YER125W	RSP5	Reverses Spt- Phenotype	-0.196584	-0.151135
YHL021C	AIM17	Altered Inheritance rate of Mitochondria	-0.809915	-0.648054
YHR091C	MSR1	Mitochondrial tRNA Synthetase aRginine	-0.416673	-0.321106
YHR137W	ARO9	AROmatic amino acid requiring	-0.42323	-1.5502
YHR161C	YAP1801	Yeast Assembly Polypeptide	-0.506867	-0.472892
YIL017C	VID28	Vacuolar Import and Degradation	-0.519702	-0.4107
YIL056W	VHR1	VHt1 Regulator	-0.339018	-0.962832
YIL095W	PRK1	p53 Regulatory Kinase	-0.419619	-0.39752
YIR033W	MGA2	Multicopy suppressor of GAm1 (snf2)	-0.279118	-0.441734
YKL091C			-0.653826	-0.395513
YKL126W	YPK1	Yeast Protein Kinase	-0.722686	-0.430208
YKL129C	MYO3	MYOsin	-0.474836	-0.157578
YKL220C	FRE2	Ferric REductase	-0.553206	-1.02312
YKR003W	OSH6	OxySterol binding protein Homolog	-1.441	-0.450873
YKR052C	MRS4	Mitochondrial RNA Splicing	-0.484623	-0.425644
YKR098C	UBP11	UBiquitin-specific Protease	-0.763321	-0.327741
YDL027C	MRX9	Mitochondrial oRganization of gene eXpression (MIOREX)	-0.626894	-0.281486
YDL039C	PRM7	Pheromone-Regulated Membrane protein	-0.89489	-0.692291
YDL089W	NUR1	NUclear Rim1	-0.280511	-0.36736
YDL113C	ATG20	AuTophaGy related	-0.542577	-0.378586
YDL180W			-0.27428	-0.708399
YDL239C	ADY3	Accumulation of DYads	-0.658149	-0.786567
YDR003W	RCR2	Resistance to Congo Red	-0.401187	-0.354395
YDR036C	EHD3		-0.58256	-0.344788
YDR040C	ENA1	Exitus NAtru (Latin, "exit sodium")	-0.865222	-1.04599
YDR062W	LCB2	Long-Chain Base	-0.222525	-0.157426
YDR122W	KIN1	KINase	-0.358266	-0.21881
YDR129C	SAC6	Suppressor of ACtin	-0.377425	-0.170932
YDR164C	SEC1	SECretory	-0.326641	-0.279985
YDR255C	RMD5	Required for Meiotic nuclear Division	-0.704624	-0.21582
YDR262W			-0.245645	-0.420074
YDR264C	AKR1	AnKyrin Repeat containing	-0.310251	-0.260515
YDR380W	ARO10	AROmatic amino acid requiring	-1.22082	-2.47706
YGL006W	PMC1	Plasma Membrane Calcium	-0.639841	-0.582773
YGL084C	GUP1	Glycerol UPtake	-0.370671	-0.322368
YGL117W			-0.683257	-1.10623
YGL157W	ARI1	Aldehyde Reductase Intermediate, subclass of SDR	-0.89215	-0.429141
YGL167C	PMR1	Plasma Membrane ATPase Related	-0.202074	-0.321005
YGL206C	CHC1	Clathrin Heavy Chain	-0.239524	-0.254699
YGL229C	SAP4	Sit4 Associated Protein	-0.736221	-0.645665
YGR019W	UGA1	Utilization of GAba	-0.44835	-0.495569
YGR127W			-0.435439	-0.339383
YGR213C	RTA1	Resistance To 7-Aminocholesterol	-2.61463	-1.06399
YGR255C	COQ6	COenzyme Q	-0.547241	-0.232182
YJL034W	KAR2	KARyogamy	-0.250297	-0.510232
YJL082W	IML2	Increased Minichromosome Loss	-0.648766	-0.203897
YJL093C	TOK1		-0.352615	-0.264956
YJL094C	KHA1	K/H ion Antiporter	-0.435966	-0.589954
YJL116C	NCA3	Nuclear Control of ATPase	-1.94141	-0.743479
YJL213W			-1.16375	-1.26576
YJR005W	APL1	clathrin Adaptor Protein complex Large chain	-0.517604	-0.437557
YJR109C	CPA2	Carbamyl Phosphate synthetase A	-0.403841	-0.842143
YJR148W	BAT2	Branched-chain Amino acid Transaminase	-0.701806	-0.70599
YLL013C	PUF3	PUmilio-homology domain Family	-0.315166	-0.296244
YLR030W			-1.607	-1.10236
YLR031W			-1.45146	-1.44368
YLR034C	SMF3		-0.492396	-0.583377
YLR047C	FRE8		-0.601414	-0.264036
YLR136C	TIS11	similar to the mammalian TPA Induced Sequence gene family	-1.9302	-1.84467
YLR241W	CSC1	Calcium permeable Stress-gated cation Channel	-0.29884	-0.159493
YLR450W	HMG2	3-Hydroxy-3-MethylGlutaryl-coenzyme a reductase	-0.255209	-0.258741
YMR008C	PLB1	PhosphoLipase B	-1.13564	-0.322028
YMR020W	FMS1	Fenpropimorph-resistance Multicopy Suppressor	-0.475062	-0.360342
YMR031C	EIS1	EISosome	-0.598399	-0.496003
YMR032W	HOF1	Homolog Of cdc Fifteen	-0.448204	-0.497262
YMR034C	RCH1	Regulator of Calcium Homeostasis	-0.947381	-1.10457
YMR084W			-1.08481	-0.860402
YMR085W			-0.826394	-1.01473
YMR109W	MYO5	MYOsin	-0.458269	-0.200379
YMR119W	ASI1	Amino acid Sensor-Independent	-0.557541	-0.411622
YMR140W	SIP5	Snf1 Interacting Protein	-0.406578	-0.249061
YMR258C	ROY1	Repressor Of Ypt52	-0.364818	-0.262489
YMR281W	GPI12	GlycosylPhosphatidylInositol anchor biosynthesis	-0.58459	-0.753237
YMR304W	UBP15	UBiquitin-specific Protease	-0.292559	-0.223384
YMR313C	TGL3	TriacylGlycerol Lipase	-0.265983	-0.276974
YMR316W	DIA1	Digs Into Agar	-0.898821	-0.46206
YNL012W	SPO1	SPOrulation	-0.533889	-0.78973
YNL020C	ARK1	Actin Regulating Kinase	-0.552829	-0.3504
YNL049C	SFB2	Sed Five Binding	-0.349136	-0.28749
YNL073W	MSK1	Mitochondrial aminoacyl-tRNA Synthetase, lysine (K)	-0.29858	-0.183596
YNL159C	ASI2	Amino acid Sensor-Independent	-0.484976	-0.330337
YNL160W	YGP1	Yeast GlycoProtein	-2.1073	-0.838769
YNL229C	URE2	UREidosuccinate transport	-0.308552	-0.162207
YNL237W	YTP1	Yeast putative Transmembrane Protein	-1.93282	-0.573037
YNR059W	MNT4	MaNnosylTransferase	-0.557573	-0.537575
YNR060W	FRE4	Ferric REductase	-1.21733	-1.38745
YNR075W	COS10	COnserved Sequence	-0.511735	-0.622337
YOL011W	PLB3	PhosphoLipase B	-0.485234	-0.302816
YOL083W	ATG34	AuTophaGy related	-0.892965	-0.392771
YOL087C	DUF1	DUB-associated Factor 1	-0.583393	-0.173278
YOL104C	NDJ1	NonDisJunction	-1.01712	-1.20004
YOL158C	ENB1	ENteroBactin	-1.22174	-0.512515
YOR014W	RTS1	Rox Three Suppressor	-0.292991	-0.356664
YOR018W	ROD1	Resistance to O-Dinitrobenzene	-0.649196	-0.517998
YOR197W	MCA1	MetaCAspase	-0.403594	-0.221578
YOR219C	STE13	STErile	-0.384636	-0.498688
YOR220W	RCN2	Regulator of CalciNeurin	-0.589371	-0.56286
YOR227W	HER1	Hmg2p ER Remodeling	-0.473329	-0.341398
YOR245C	DGA1	DiacylGlycerol Acyltransferase	-0.240752	-0.365708
YOR275C	RIM20	Regulator of IME2	-0.330951	-0.334927
YOR329C	SCD5	Suppressor of Clathrin Deficiency	-0.642706	-0.184473
YOR336W	KRE5	Killer toxin REsistant	-0.316471	-0.286066
YOR381W	FRE3	Ferric REductase	-1.08913	-0.718229
YOR385W			-0.57658	-0.494386
YPL006W	NCR1	Niemann-pick type C Related	-0.304269	-0.284387
YPL154C	PEP4	carboxyPEPtidase Y-deficient	-0.519053	-0.290376
YPL167C	REV3	REVersionless	-0.398933	-0.336434
YPL259C	APM1	clathrin Adaptor Protein complex Medium chain	-0.338124	-0.232922
YPL260W	CUB1	Cu2+ suppressing and Bleomycin sensitive	-0.291595	-0.267425
YPR198W	SGE1	Suppression of Gal11 Expression	-0.321186	-0.628863
YDR170W-A			-0.538106	-1.34569
YOR343W-B			-0.390715	-0.38606
YNL284C-B			-0.626844	-0.566848
YDR261C-D			-0.326444	-1.3089
YDR379C-A	SDH6		-0.96591	-0.746288
YPR036W-A	SPO24	SPOrulation	-0.627495	-0.848659
YPR145C-A			-0.926619	-1.57935
