# Supplementary material for: A role for condensin in mediating transcriptional adaptation to environmental stimuli
Source: Life Sci Alliance. 2021 Jun 3;4(7):e202000961. doi: 10.26508/lsa.202000961 (PMC8200293; doi:10.26508/lsa.202000961)
Supplement: Supplementary file 2 [file LSA-2020-00961_TableS2.xlsx]

## Sheet: Strains
Table S2. Strains, primers, antibodies and plasmids used in this study.
Strain name	genotype	Source
Y141	W303-1A, Mat a, ade2-1, trp1-1, can1-100, leu2-3,112, his3-11,15, ura3, GAL, psi+	Lab stock
Y5915 (Control)	Mat a, ade2-1, can1-100, leu2-3,112, his3-11,15, ura3, GAL, psi+ , YCG1-3PK:: K.lactis TRP1	This study
Y5911 (ycg1Degron1)	Mat a, trp1-1, can1-100, leu2-3,112, his3-11,15, GAL, psi+, (K.lactis URA3)pMET3-YCG1-3PK-3miniAID::KANMX6, ADE2::pADH1-OsTIR1-9Myc	This study
Y5931 (ycg1Degron2)	Mat a, trp1-1, can1-100, leu2-3,112, his3-11,15, GAL, psi+, (K.lactis URA3)pMET3-YCG1-3PK-miniAID::KANMX6, ADE2::pADH1-OsTIR1-9Myc	This study

## Sheet: Primers
Table S2. Strains, primers, antibodies and plasmids used in this study.
Primers	P1	P2	Source
ACT1	CTCCACCACTGCTGAAAGAGAA	CGAAGTCCAAGGCGACGTAA	Lab stock
UBC6	GATACTTGGAATCCTGGCTGGTCTGTCTC	AAAGGGTCTTCTGTTTCATCACCTGTATTTGC	Teste et al, 2209
FIG1	CCCTCCCAATATAGCTCTTA	TTGGGCTAACTTCAAAATGT	This study
ITS1	CAAGAGATGGAGAGTCCAGC	GTGTGTTGTATTGAAACGGTTT	This study
AGA2	CGAGCAAATCCCCTCACCAA	GTTTATGGGGCTGCCTTTGC	This study
NTS2 rDNA probe	GATAGTTTAACGGAAACGCAGGTGA	GAAGTACCTCCCAACTACTTTTCCT	Jon Houseley
HHT1	CTGCCATTCACGCCAAGC	ATGATCTTTCACCTCTTAATCTTCTAGCC	Zunder and Rine, 2012
HHT2	CCCCAAGAAAACAATTAGCCTCC	AAGGCAACAGTACCTGGCTTAT	Zunder and Rine, 2012
HHF1	AAGAGATAACATCCAAGGTATTACTAAGCC	CAAACCAGAAATACGCTTGACAC	Zunder and Rine, 2012
HHT2	CAAACCAGAAATACGCTTGACAC	CAAACCAGAAATACGCTTGACAC	Zunder and Rine, 2012
HHF2	ATCAGGGACTCTGTTACTTACACT	GGTTCTACCTTGTCTCTTCAAAGCATAAA	Zunder and Rine, 2012
HTA1	GGTTCTGGTGCTCCAGTCTAC	TCTTCTTGTTATCCCTAGCAGCAT	Zunder and Rine, 2012
HTB1	AGAGAAGCAAGGCTAGAAAGGA	GGAAATACCAGTGTCAGGGTG	Zunder and Rine, 2012
HTA2	AGCTGGTTTAACATTCCCAGTT	GCAGTTAGATAGACTGGAGCAC	Zunder and Rine, 2012
HTB2	GATTGATCTTACCTGGTGAATTGGCTAAA	GGCTTGAGTAGAGGAGGAGTAT	Zunder and Rine, 2012
Ty1	TCCATCATCAGTTGGAACGC	GAGGTTAACATTGGTGGTGG	Antonin Morillon
Ty2 (Red)	ATGGACAGTACCAACAGCACGG	AGGAAGTACTCAGTGGTGGGA	This study
Ty2 (Grey)	AACGGTTGATTCATTAATGTG	GTCCCAATACAAACAACACA	This study
Ty2 (Purple)	TTCTGTTGCTGGCCTAAGAC	TAGTTCAAAACCAAGAGCAGC	This study

## Sheet: Antibodies
Table S2. Strains, primers, antibodies and plasmids used in this study.
Antibody	Source	Organism	Dilution
𝛼Tub1	The Francis Crick Institute cell services	Mouse	1:5000
𝛼PK	MCA1360, Biorad	Mouse	1:2000
𝛼Clb2	sc-9071, Santa Cruz	Rabbit	1:1000
𝛼Sic1	sc-50441, Santa Cruz	Rabbit	1:1000
𝛼Nop1	28F2, Invitrogen	Mouse	1:1000
𝛼-𝛼 Tubulin	YOL1/34 Bio Rad	Rat	1:200
𝛼Streptavadin HRP conjugate	RPN1231, Cytiva	n/a	1:50000
𝛼-Mouse HRP	NA931, Amersham	Sheep	1 :5000
𝛼-Rabbit HRP	NA934, Amersham	Donkey	1:5000

## Sheet: Plasmid list
Table S2. Strains, primers, antibodies and plasmids used in this study.
Number	Name	Description	Origin
554	pUC19-3Pk-KI TRP1	One-step pk tagging vector	Wolfgang Zachariae
1086	pRSII402(PADHI-OsTIR1-9myc)	osTIR1 for integration into ADE2 locus	Celine Bouchoux
1172	3Pk-3miniAID-KanMX	C-terminal AID tagging vector with 3 tandem copies of the miniAID	Rahul Thadani
1174	3Pk-miniAID-KanMX	C-terminal AID tagging vector with single miniAID	Rahul Thadani
1177	pFA6a-KIURA3-pMET3	MET3 promoter for one-step exchange	Celine Bouchoux
