# Supplementary material for: A role for condensin in mediating transcriptional adaptation to environmental stimuli
Source: Life Sci Alliance. 2021 Jun 3;4(7):e202000961. doi: 10.26508/lsa.202000961 (PMC8200293; doi:10.26508/lsa.202000961)
Supplement: Supplementary file 3 [file LSA-2020-00961_TableS3.xlsx]

## Sheet: Sheet1
Table S3. RNA sequencing mapping statistics.
sample	Total raw reads	Total mapped reads	Mapped %		Prefix	scerevisiae Total Reads	scerevisiae Mapped %
G1_Degron1_POLYA_R1	13859576	13471744	97.2017		Control_Untreated_R1	17541479	88.12%
G1_Degron1_POLYA_R2	24464611	23760921	97.1236		Control_Untreated_R2	18841274	87.90%
G1_Degron1_POLYA_R3	12956511	12657730	97.694		Control_Untreated_R3	21734749	91.61%
G1_Degron1_TOTAL_R1	16133811	16043780	99.442		Control_DEP_R1	17006490	89.01%
G1_Degron1_TOTAL_R2	16483283	16387369	99.4181		Control_DEP_R2	17833071	88.95%
G1_Degron1_TOTAL_R3	17609886	17513831	99.4545		Control_DEP_R3	19075119	88.81%
G1_Control_POLYA_R1	28637464	27611522	96.4175		Control_HS_R1	20025490	71.63%
G1_Control_POLYA_R2	14569115	14112846	96.8682		Control_HS_R2	16748066	68.91%
G1_Control_POLYA_R3	17419588	16704067	95.8924		Control_HS_R3	19123903	68.50%
G1_Control_TOTAL_R1	19803261	19694810	99.4524		Degron2_Untreated_R1	19314143	91.93%
G1_Control_TOTAL_R2	19086261	18981180	99.4494		Degron2_Untreated_R2	18531222	91.22%
G1_Control_TOTAL_R3	22278265	22163414	99.4845		Degron2_Untreated_R3	18235217	90.49%
M_Degron1_POLYA_R1	12907464	12574355	97.4193		Degron2_DEP_R1	19082548	93.37%
M_Degron1_POLYA_R2	14712529	14230120	96.7211		Degron2_DEP_R2	21707389	92.71%
M_Degron1_POLYA_R3	12890998	12553776	97.3841		Degron2_DEP_R3	18323140	92.34%
M_Degron1_TOTAL_R1	14320749	14236607	99.4124		Degron2_HS_R1	18673401	83.57%
M_Degron1_TOTAL_R2	18196789	18108715	99.516		Degron2_HS_R2	22954020	81.55%
M_Degron1_TOTAL_R3	16053106	15976427	99.5223		Degron2_HS_R3	14339276	81.18%
M_Control_POLYA_R1	23697091	23029860	97.1843
M_Control_POLYA_R2	13610856	13141418	96.551
M_Control_POLYA_R3	22341617	21695792	97.1093
M_Control_TOTAL_R1	20944237	20830660	99.4577
M_Control_TOTAL_R2	15858650	15769278	99.4364
M_Control_TOTAL_R3	18658584	18562192	99.4834
